# Supplementary material for: Highly improved rechargeable stability for lithium/silver vanadium oxide battery induced viaelectrospinning technique
Source: Royal Society of Chemistry journal article supplement (doi:10.1039/c2ta00042c), 2012-10-22
Supplement: c2ta00042c.pdf [file c2ta00042c.pdf]

## Supporting information

### Highly improved rechargeable stability for lithium/silver vanadium oxide battery induced via electrospinning technique

Yongzhi Wu,<sup>a,b,c</sup> Peining Zhu,<sup>a,d</sup> Xuan Zhao,<sup>a,e</sup> M. V. Reddy,<sup>\*c</sup> Shengjie Peng,<sup>\*a,e</sup>

**B. V. R. Chowdari,<sup>c</sup> and S. Ramakrishna<sup>a,d</sup>**

<sup>a</sup> Center for Nanofibers & Nanotechnology, Nanoscience and Nanotechnology Initiative, National University of Singapore, 117581, Singapore

<sup>b</sup> NUS Graduate School for Integrative Sciences and Engineering, 117456, Singapore

<sup>c</sup> Department of Physics, National University of Singapore, 117542, Singapore

<sup>d</sup> Department of Mechanical Engineering, National University of Singapore, 117574, Singapore

<sup>e</sup> School of Materials Science and Engineering, Nanyang Technological University, 639798, Singapore

\*E-mail: [phymvvr@nus.edu.sg](mailto:phymvvr@nus.edu.sg); [sjpeng@ntu.edu.sg](mailto:sjpeng@ntu.edu.sg)

### Supplementary EDS results for $\beta$ -SVO NRs

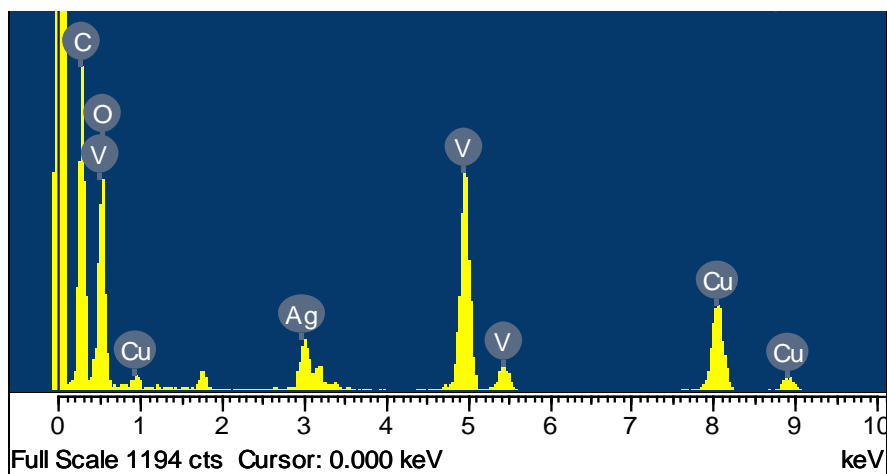

**Fig. S1** Energy dispersive X-ray spectroscopy (EDS) results for  $\beta$ -SVO NRs of peaks for all possible elements.

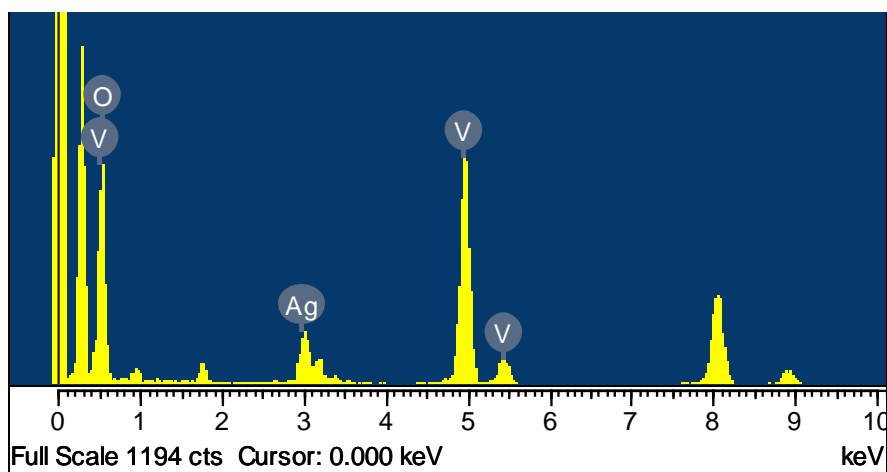

**Fig. S2** EDS results for  $\beta$ -SVO NRs waving peaks for carbon and copper due to the carbon coated Copper TEM grid.

Spectrum processing: Peaks possibly omitted: 0.931, 1.748, 8.033, 8.899 keV

Quantitation method: Cliff Lorimer thin ratio section.

Processing option: All elements analyzed (Normalised)

Number of iterations = 1

| Element | Peak Area | Area Sigma | k factor | Abs Corr. | Weight% | Weight% Sigma | Atomic% |
|---------|-----------|------------|----------|-----------|---------|---------------|---------|
| O K     | 1608      | 110        | 1.403    | 1.000     | 28.67   | 1.52          | 60.51   |
| V K     | 4746      | 115        | 0.813    | 1.000     | 49.06   | 1.40          | 32.52   |
| Ag L    | 1349      | 100        | 1.299    | 1.000     | 22.26   | 1.38          | 6.97    |

**Table S1.** Atomic percentages and obtained parameters for  $\beta$ -SVO NRs in EDS measurement.

### Complementary images for materials characterization

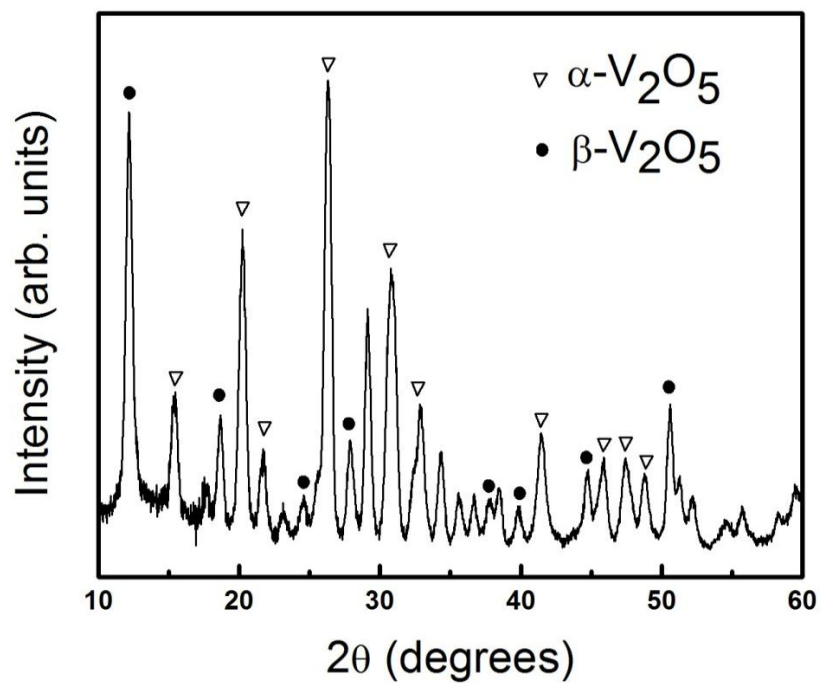

**Fig. S3** XRD pattern for electrospun VO<sub>x</sub> nanofibers, corresponding to oxide precursors in step b demonstrated in Scheme 1.

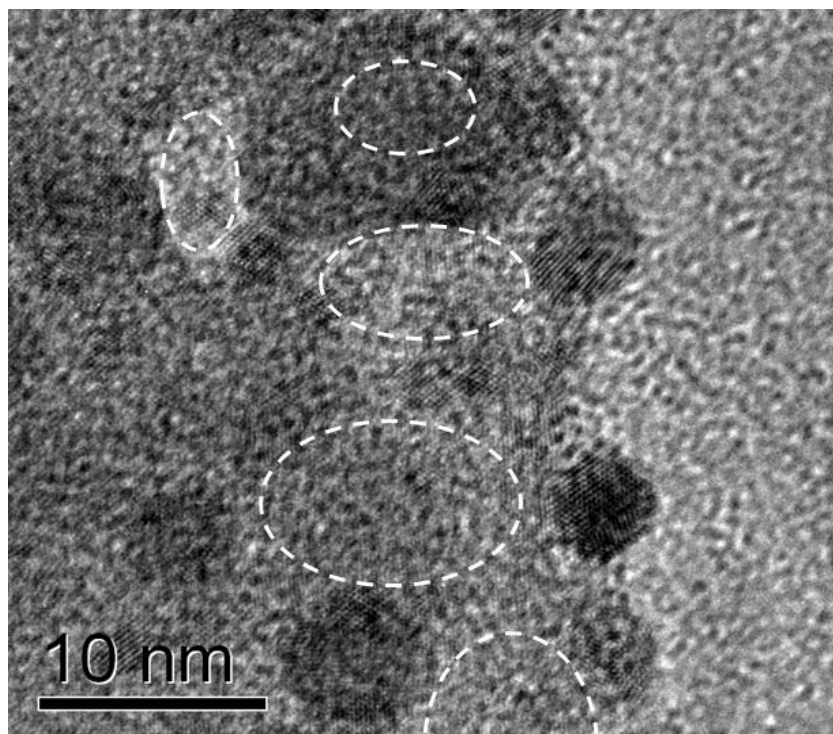

**Fig. S4** TEM image for the surface on  $\beta$ -SVO NRs presenting nanopores between decorated Ag nanodots.

### Supplementary information on the electrochemical performance of $\beta$ -SVO NRs

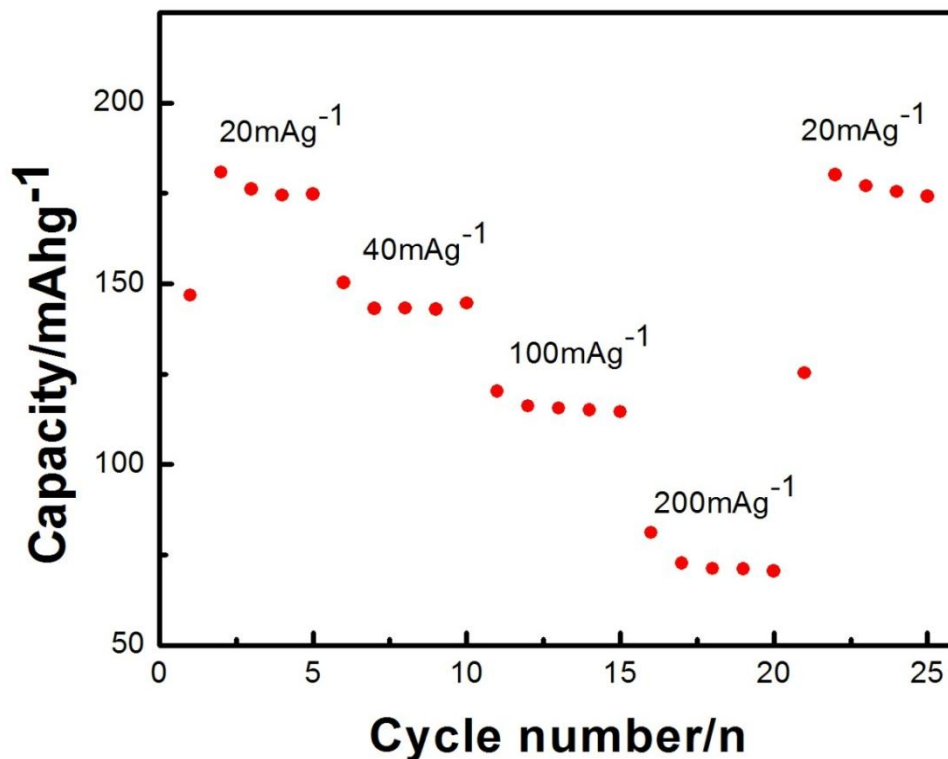

**Fig. S5** Discharge capacity vs. cycle number plots of cell Li/ $\beta$ -SVO NRs (stored for more than four months) in the voltages range of 2–3.6 V at 20 mA<sup>-1</sup>, 40 mA<sup>-1</sup>, 100 mA<sup>-1</sup> and 200 mA<sup>-1</sup>, respectively at room temperature.

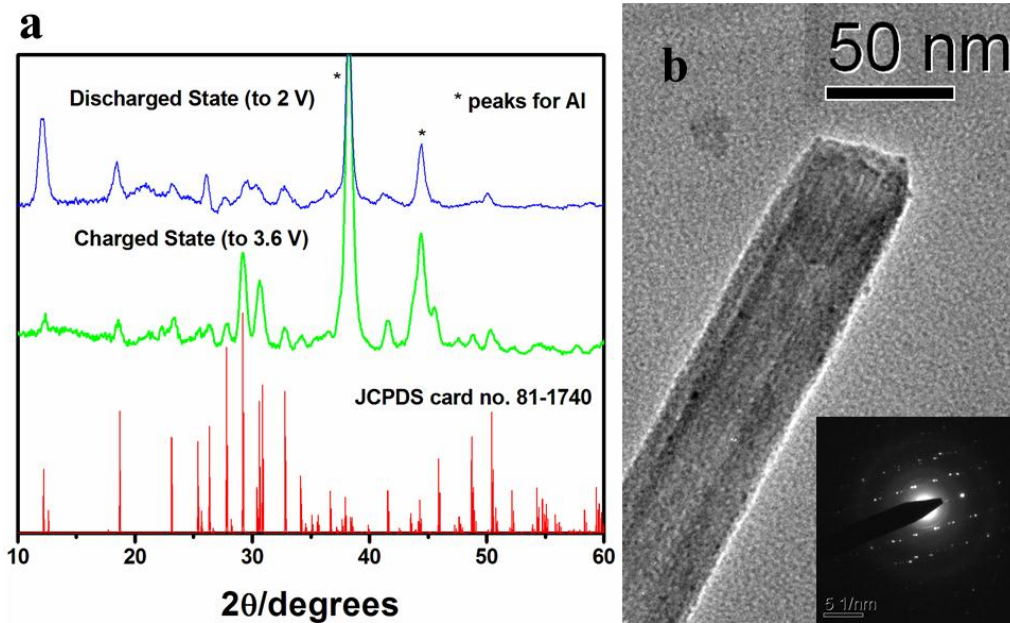

**Fig. S6 a.** XRD pattern for  $\beta$ -SVO NRs after cycling for more than 30 cycles in charged and discharged state; **b.** TEM images (with SAED pattern) for  $\beta$ -SVO NRs recharged back to 3.6 V.

### Electrochemical performance in the comparison study with $\beta$ - $\text{AgVO}_3$ NW

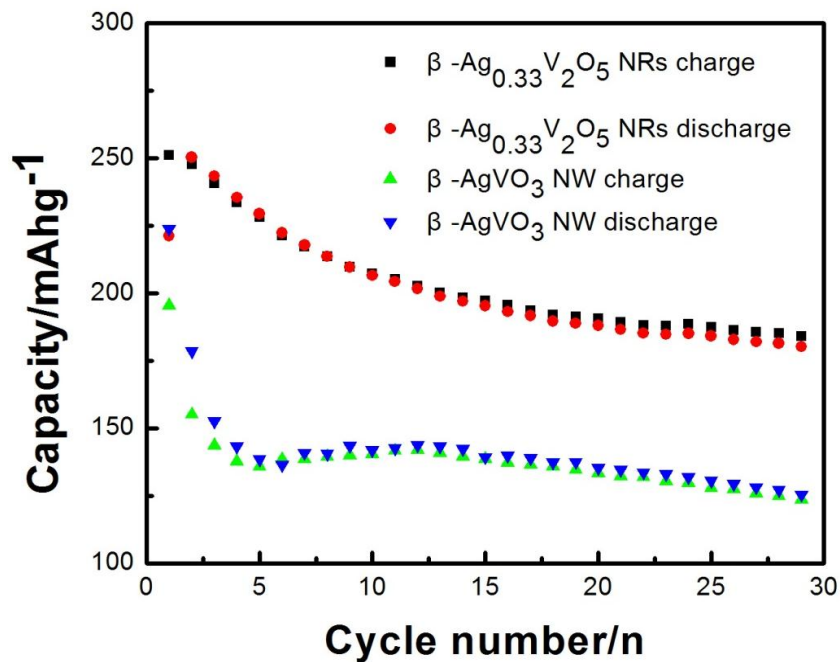

**Fig. S7** Capacity vs. cycle number plots of cell Li/ $\beta$ - $\text{AgVO}_3$  NW in the voltage range of 2-3.6 V at  $20 \text{ mA g}^{-1}$  in comparison with  $\beta$ -SVO NRs.

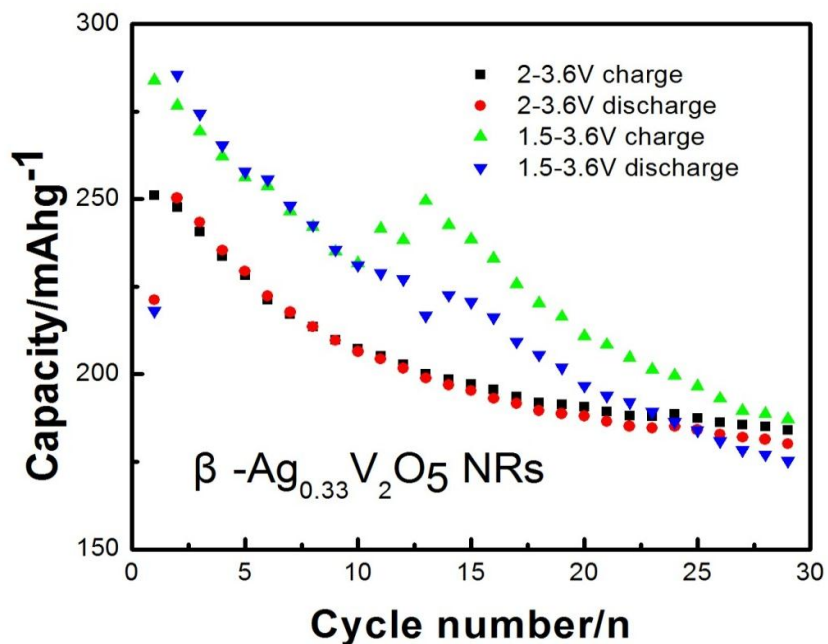

**Fig. S8** Capacity vs. cycle number plots of cell Li/ $\beta$ -SVO NRs in the voltage window of 1.5-3.6 V and 2-3.6 V, respectively, at  $20 \text{ mA g}^{-1}$ .
